# Supplementary material for: Reef manta rays forage on tidally driven, high density zooplankton patches in Hanifaru Bay, Maldives
Source: PeerJ. 2021 Aug 23;9:e11992. doi: 10.7717/peerj.11992 (PMC8388554; doi:10.7717/peerj.11992)
Supplement: Supplemental Information 1 [file peerj-09-11992-s001.xlsx]

## Sheet: Plankton
Sample	Date	TimeIN	TimeOUT	Distance_m	Mantas	Feeding	Cleaning	Cruising	Behaviour	Dominant	DensityIndex	DryWeight_mg	TotalVolume_m3	SampleSplit	FractionedVolume_m3	Biomass_MGperM3
M1	2017-08-13	15:20:00	15:22:00	77.4707	1	0	1	0	NonFeeding	NA	NA	365.8	15.2113	0.5	7.60566	48.0957
M2	2017-08-13	15:52:00	15:55:00	58.5713	5	0	5	0	NonFeeding	NA	NA	45.6	11.5004	0.5	5.75022	7.93012
M3	2017-08-13	16:09:00	16:12:00	71.1431	1	0	1	0	NonFeeding	NA	NA	78.1	13.9689	0.5	6.98446	11.182
M4	2017-08-13	16:28:00	16:31:00	87.5031	0	0	0	0	Absent	NA	NA		NA	NA	NA	NA
M5	2017-08-14	14:07:00	14:09:00	50.1207	1	0	1	0	NonFeeding	NA	0	5.3	9.84118	0.5	4.92059	1.07711
M6	2017-08-14	14:31:00	14:34:00	55.8655	0	0	0	0	Absent	NA	0	26.9	10.9692	0.5	5.48458	4.90466
M7	2017-08-14	15:00:00	15:02:00	64.7323	0	0	0	0	Absent	NA	0	19.4	12.7102	0.5	6.35508	3.05268
M8	2017-08-14	15:26:00	15:28:00	59.612	0	0	0	0	Absent	NA	0	46.6	11.7048	0.5	5.8524	7.96255
M9	2017-08-14	15:53:00	15:55:00	52.4519	0	0	0	0	Absent	NA	1	33.3	10.2989	0.5	5.14946	6.4667
M10	2017-08-14	16:17:00	16:19:00	41.7118	0	0	0	0	Absent	NA	1	58.6	8.19009	0.5	4.09504	14.31
M11	2017-08-14	16:46:00	16:48:00	47.2484	0	0	0	0	Absent	NA	2	282.3	9.27719	0.5	4.6386	60.8589
M12	2017-08-14	17:11:00	17:13:00	39.4222	0	0	0	0	Absent	NA	3	797.4	7.74053	0.5	3.87027	206.032
M13	2017-08-15	14:12:00	14:15:00	59.6537	0	0	0	0	Absent	NA	0	3.8	11.713	0.5	5.85648	0.648854
M14	2017-08-15	14:45:00	14:47:00	76.8462	0	0	0	0	Absent	NA	0	7.3	15.0887	0.5	7.54436	0.96761
M15	2017-08-15	15:13:00	15:15:00	54.5333	0	0	0	0	Absent	NA	0	4.8	10.7076	0.5	5.3538	0.89656
M16	2017-08-15	15:53:00	15:55:00	63.1088	0	0	0	0	Absent	NA	0	18.7	12.3914	0.5	6.19569	3.01823
M17	2017-08-15	16:27:00	16:29:00	59.5704	0	0	0	0	Absent	NA	1	33.8	11.6966	0.5	5.84831	5.77945
M18	2017-08-15	16:56:00	16:58:00	45.5832	0	0	0	0	Absent	NA	1	227.8	8.95024	0.5	4.47512	50.9036
M19	2017-08-15	17:24:00	17:27:00	49.9542	0	0	0	0	Absent	NA	3	3154.1	9.80849	0.5	4.90424	643.137
M20	2017-08-16	10:24:00	10:26:00	52.4519	5	5	0	0	Feeding	StraightSolo	2	715	10.2989	0.5	5.14946	138.85
M21	2017-08-16	10:40:00	10:42:00	37.6738	6	5	1	0	Feeding	StraightSolo	2	367.1	7.39723	0.5	3.69862	99.2533
M22	2017-08-16	10:55:00	10:57:00	42.2113	8	8	0	0	Feeding	StraightSolo	2	211.9	8.28817	0.5	4.14409	51.1331
M23	2017-08-16	11:11:00	11:13:00	35.4259	7	7	0	0	Feeding	StraightSolo	2	192.2	6.95585	0.5	3.47793	55.2628
M24	2017-08-16	11:29:00	11:31:00	44.7506	6	6	0	0	Feeding	StraightSolo	1	123.5	8.78677	0.5	4.39338	28.1104
M25	2017-08-16	11:47:00	11:48:00	44.9588	1	1	0	0	Feeding	StraightSolo	1	308.5	8.82764	0.5	4.41382	69.8941
M26	2017-08-16	12:15:00	12:17:00	51.8275	6	1	0	5	NonFeeding	Somersault	0	36.9	10.1763	0.5	5.08815	7.25214
M27	2017-08-16	12:57:00	12:59:00	46.7072	4	1	1	2	NonFeeding	StraightSolo	0	116	9.17093	0.5	4.58547	25.2973
M28	2017-08-16	13:46:00	13:48:00	44.5841	5	4	0	1	Feeding	Somersault	0	38.3	8.75407	0.5	4.37704	8.75021
M29	2017-08-16	14:30:00	14:33:00	61.4437	1	0	0	1	NonFeeding	NA	0	77.9	12.0644	0.5	6.03222	12.914
M30	2017-08-16	15:17:00	15:20:00	59.2374	1	0	1	0	NonFeeding	NA	1	455.7	11.6312	0.5	5.81561	78.358
M31	2017-08-16	15:58:00	16:01:00	66.3975	2	0	1	1	NonFeeding	NA	0	34.6	13.0371	0.5	6.51856	5.30792
M32	2017-08-17	06:53:00	06:55:00	54.6166	0	0	0	0	Absent	NA	0	137.5	10.7239	0.5	5.36197	25.6435
M33	2017-08-17	07:22:00	07:24:00	55.0745	0	0	0	0	Absent	NA	0	27.5	10.8139	0.5	5.40693	5.08607
M34	2017-08-17	07:56:00	07:58:00	50.4538	1	0	1	0	NonFeeding	NA	1	301.8	9.90657	0.5	4.95329	60.9293
M35	2017-08-17	08:32:00	08:34:00	50.2456	3	2	1	0	Feeding	Surface	1	369.2	9.8657	0.5	4.93285	74.8452
M36	2017-08-17	09:01:00	09:03:00	44.7506	3	3	0	0	Feeding	Surface	2	644.4	8.78677	0.5	4.39338	146.675
M37	2017-08-17	09:27:00	09:29:00	44.4176	12	10	0	2	Feeding	Somersault	2	484.9	8.72138	0.5	4.36069	111.198
M38	2017-08-17	10:17:00	10:19:00	49.7044	7	7	0	0	Feeding	StraightSolo	2	135.9	9.75944	0.5	4.87972	27.8499
M39	2017-08-17	10:38:00	10:40:00	26.4757	15	15	0	0	Feeding	StraightSolo	3	1095.3	5.1985	0.5	2.59925	421.391
M40	2017-08-17	11:04:00	11:06:00	27.0169	18	18	0	0	Feeding	Chain	2	323.9	5.30476	0.5	2.65238	122.117
M41	2017-08-17	11:38:00	11:40:00	44.8755	15	15	0	0	Feeding	Chain	2	232.7	8.81129	0.5	4.40564	52.8186
M42	2017-08-17	12:08:00	12:10:00	41.6701	25	25	0	0	Feeding	Chain	3	546	8.18191	0.5	4.09096	133.465
M43	2017-08-17	12:37:00	12:39:00	27.8495	20	20	0	0	Feeding	Chain	3	688	5.46823	0.5	2.73412	251.635
M44	2017-08-17	13:02:00	13:04:00	30.8467	25	25	0	0	Feeding	Chain	3	1140.5	6.05674	0.5	3.02837	376.605
M45	2017-08-17	13:29:00	13:31:00	35.967	18	14	1	3	Feeding	StraightSolo	2	323.4	7.06211	0.5	3.53105	91.5874
M46	2017-08-18	09:14:00	09:16:00	43.9181	5	4	0	1	Feeding	StraightGroup	1	270.9	8.62329	0.5	4.31165	62.8298
M47	2017-08-18	09:39:00	09:41:00	37.0494	8	7	0	1	Feeding	Straight	1	295.3	7.27463	0.5	3.63731	81.1863
M48	2017-08-18	10:07:00	10:10:00	41.8366	0	0	0	0	Absent	NA	1	177.2	8.21461	0.5	4.1073	43.1427
M49	2017-08-18	10:40:00	10:42:00	36.6747	11	9	0	2	Feeding	Surface	1	65.7	7.20106	0.5	3.60053	18.2473
M50	2017-08-18	11:01:00	11:03:00	48.3307	10	8	0	2	Feeding	Somersault	2	158.1	9.48971	0.5	4.74486	33.3203
M51	2017-08-19	09:38:00	09:40:00	45.4583	0	0	0	0	Absent	NA	0	81.8	8.92572	0.5	4.46286	18.329
M52	2017-08-19	10:06:00	10:08:00	45.1669	3	1	2	0	NonFeeding	Straight	1	328.1	8.86851	0.5	4.43425	73.9922
M53	2017-08-19	10:40:00	10:42:00	48.4972	1	0	1	0	NonFeeding	NA	1	43.5	9.52241	0.5	4.7612	9.13635
M54	2017-08-19	11:13:00	11:15:00	45.3334	1	0	0	1	NonFeeding	NA	1	77.9	8.9012	0.5	4.4506	17.5033
M55	2017-08-19	11:50:00	11:52:00	38.0068	4	0	4	0	NonFeeding	NA	1	157.1	7.46262	0.5	3.73131	42.1032
M56	2017-08-19	12:18:00	12:20:00	40.0466	6	1	4	1	NonFeeding	Somersault	1	481.1	7.86314	0.5	3.93157	122.368
M57	2017-08-19	12:56:00	12:58:00	44.376	3	0	0	3	NonFeeding	NA	1	192.6	8.71321	0.5	4.3566	44.2088
M58	2017-08-19	13:24:00	13:26:00	44.9172	3	0	0	3	NonFeeding	NA	0	87.7	8.81946	0.5	4.40973	19.8878
M59	2017-08-19	13:56:00	13:58:00	44.6258	2	0	0	2	NonFeeding	NA	1	116	8.76225	0.5	4.38112	26.4772
M60	2017-08-19	14:27:00	14:29:00	51.8275	2	2	0	0	Feeding	Surface	3	1037.3	10.1763	0.5	5.08815	203.866
M61	2017-08-19	14:58:00	15:02:00	79.9267	0	0	0	0	Absent	NA	0	34.5	15.6936	0.5	7.84679	4.3967
M62	2017-08-20	11:15:00	11:17:00	52.9098	3	0	0	3	NonFeeding	NA	1	117.5	10.3888	0.5	5.19441	22.6205
M63	2017-08-20	11:45:00	11:47:00	43.2104	3	1	0	2	NonFeeding	Somersault	2	206.5	8.48434	0.5	4.24217	48.6779
M64	2017-08-20	12:12:00	12:15:00	52.7849	1	0	0	1	NonFeeding	NA	2	910.2	10.3643	0.5	5.18215	175.641
M65	2017-08-20	12:49:00	12:51:00	49.2049	2	1	0	1	Feeding	Straight	1	427.3	9.66136	0.5	4.83068	88.4555
M66	2017-08-20	13:28:00	13:30:00	43.0022	0	0	0	0	Absent	NA	2	297.3	8.44347	0.5	4.22174	70.4213
M67	2017-08-20	14:02:00	14:04:00	41.2539	1	1	0	0	Feeding	Straight	3	2404.2	8.10017	0.5	4.05009	593.617
M68	2017-08-20	14:31:00	14:34:00	41.5036	1	1	0	0	Feeding	Somersault	3	500.5	8.14922	0.5	4.07461	122.834
M69	2017-08-20	14:58:00	15:01:00	68.2708	0	0	0	0	Absent	NA	1	118.3	13.4049	0.5	6.70247	17.6502
M70	2017-08-20	15:29:00	15:32:00	65.3151	0	0	0	0	Absent	NA	0	197.6	12.8246	0.5	6.4123	30.8158
M71	2017-08-21	11:32:00	11:34:00	55.2827	17	17	0	0	Feeding	Somersault	2	447.8	10.8547	0.5	5.42736	82.5079
M72	2017-08-21	11:58:00	12:01:00	45.8746	12	11	0	1	Feeding	StraightGroup	2	692.3	9.00746	0.5	4.50373	153.717
M73	2017-08-21	12:24:00	12:26:00	37.7987	11	10	0	1	Feeding	Chain	3	529.3	7.42175	0.5	3.71088	142.635
M74	2017-08-21	12:49:00	12:51:00	48.3307	3	0	0	3	NonFeeding	NA	2	156.2	9.48971	0.5	4.74486	32.9199
M75	2017-08-21	13:24:00	13:26:00	47.4149	7	7	0	0	Feeding	Somersault	3	2640.3	9.30989	0.5	4.65494	567.203
M76	2017-08-21	13:56:00	13:59:00	32.8033	8	8	0	0	Feeding	StraightGroup	2	788.1	6.44091	0.5	3.22045	244.717
M77	2017-08-21	14:32:00	14:36:00	66.6056	2	2	0	0	Feeding	StraightSolo	1	579.8	13.078	0.5	6.53899	88.6681
M78	2017-08-21	15:04:00	15:07:00	52.9098	1	1	0	0	Feeding	Straight	1	616.3	10.3888	0.5	5.19441	118.647
